# Supplementary material for: Priming Potato Plants with Melatonin Protects Stolon Formation under Delayed Salt Stress by Maintaining the Photochemical Function of Photosystem II, Ionic Homeostasis and Activating the Antioxidant System
Source: MDPI journal article supplement (doi:10.3390/ijms24076134), 2023-03-24
Supplement: s1 [file s1]

**Table S1.** Primers used in the analysis and alignment of all studied genes.

| Gene            | Accession number | Primer sequence                                            |  | PCR product length |
|-----------------|------------------|------------------------------------------------------------|--|--------------------|
|                 |                  | F – forward primer                                         |  |                    |
|                 |                  | R – reverse primer                                         |  |                    |
| Reference genes |                  |                                                            |  |                    |
| EF1 $\alpha$    | LOC102600998     | F – ATTGGAAATGGATATGCTCCA                                  |  | 101                |
|                 | LOC102600107     | R – TCCTTACCTGAACGCCTGTCA                                  |  |                    |
| Cyclophilin     | LOC102586427     | F – GCTCTTCGCCGATACCACTC                                   |  | 120                |
|                 |                  | R – ACACGGTGGAAGGTTGAGC                                    |  |                    |
| Target genes    |                  |                                                            |  |                    |
| <i>P5CS1</i>    | LOC102582423     | F – CTGCTCCTACATTTCTCTCCTTCG<br>R – CGCTCCTAATCTTCCAAGTGCT |  | 160                |
| <i>PDH</i>      | LOC102588726     | F – ATAAGTGAATTTGTACACCA                                   |  | 117                |
|                 | LOC102588395     | R – GGCGAAAAGTGGAAGCG                                      |  |                    |
| <i>PAL</i>      | LOC102596343     | F – TCGCTGAAGTGATGAACGGAA<br>R – ATTGTGGAGATGTTCTGGAGA     |  | 207                |
|                 | LOC102585357     |                                                            |  |                    |
|                 | LOC102585026     |                                                            |  |                    |
|                 | LOC102587888     |                                                            |  |                    |
|                 | LOC102596891     |                                                            |  |                    |
| <i>CHS1a</i>    | LOC102577871     | F – CTTGTCCCCGATAGCGAA<br>R – AAATAGAGAGTTCCAGTCAGAT       |  | 162                |
| <i>APX1</i>     | LOC102586473     | F – CTGGTGTCTGTTGCTGTTGAA                                  |  | 259                |
|                 | LOC102586145     | R – AAGATAAGAGGATTGGCGGTC                                  |  |                    |
| <i>APX3</i>     | LOC102597356     | F – CCTTCTTTAGGGATTACGCCAT<br>R – AGCCACAACAACACCTACAGCA   |  | 131                |
| <i>SOS1</i>     | LOC102602690     | F – TTGCCTCACCATTCCATTG<br>R – TGATGCTTCTGTGTTGTGGAAG      |  | 138                |
| <i>NHX1</i>     | LOC102578176     | F – TGTTGATCCCTTTTCGACCAT<br>R – CCAAATAGGGGTCGCATAAA      |  | 111                |
| <i>NHX2</i>     | LOC102605641     | F – TGTTACTGGCATTCTGGTTTAC<br>R – AATAGACAGAACAGTGACAGGA   |  | 124                |
| <i>NHX3</i>     | LOC102589621     | F – GTCCATTACTGCCCTTGTTAT<br>R – AAATGATAGGTGGAAGAAGGTAA   |  | 131                |
