# Supplementary material for: Priming Potato Plants with Melatonin Protects Stolon Formation under Delayed Salt Stress by Maintaining the Photochemical Function of Photosystem II, Ionic Homeostasis and Activating the Antioxidant System
Source: MDPI journal article supplement (doi:10.3390/ijms24076134), 2023-03-24
Supplement: s1 [file s1]

**Table S3.** Influence of melatonin on the levels of *APX1* and *APX3* gene transcripts in *Solanum tuberosum* leaves under saline conditions.

| Treatment |                    |                                 |     |                    |     |
|-----------|--------------------|---------------------------------|-----|--------------------|-----|
| NaCl, mM  | Melatonin, $\mu$ M | <i>APX1</i>                     | %   | <i>APX3</i>        | %   |
| 0         | 0                  | 0.848 $\pm$ 0.015               | 100 | 0.037 $\pm$ 0.001  | 100 |
| 125       | 0                  | 0.892 $\pm$ 0.015               | 105 | 0.027 $\pm$ 0.001* | 75  |
| 125       | 0.1                | 0.486 $\pm$ 0.026* <sup>#</sup> | 57  | 0.028 $\pm$ 0.002* | 77  |
| 125       | 1.0                | 0.586 $\pm$ 0.041* <sup>#</sup> | 69  | 0.028 $\pm$ 0.002* | 78  |
| 125       | 10.0               | 0.651 $\pm$ 0.032* <sup>#</sup> | 77  | 0.028 $\pm$ 0.001* | 77  |

\*p < 0.05 compared to the control value; <sup>#</sup>p < 0.05 compared to «125 mM NaCl» value.
