# Supplementary material for: Priming Potato Plants with Melatonin Protects Stolon Formation under Delayed Salt Stress by Maintaining the Photochemical Function of Photosystem II, Ionic Homeostasis and Activating the Antioxidant System
Source: MDPI journal article supplement (doi:10.3390/ijms24076134), 2023-03-24
Supplement: s1 [file s1]

**Table S2.** Influence of melatonin on the photochemical activity of photosystem II of *Solanum tuberosum* leaves under saline conditions.

| Treatment   |                       | Y (II)     |     | ETR                      |     | qN         |     | NPQ        |     | Y (NO)                 |     | Y (NPQ)    |     | F <sub>v</sub> /F <sub>m</sub> |     |
|-------------|-----------------------|------------|-----|--------------------------|-----|------------|-----|------------|-----|------------------------|-----|------------|-----|--------------------------------|-----|
| NaCl,<br>mM | Melato-<br>nin,<br>μM | %          | %   | %                        | %   | %          | %   | %          | %   | %                      | %   | %          | %   | %                              | %   |
| 0           | 0                     | 0.60±0.02  | 100 | 47.56±1.76               | 100 | 0.33±0.04  | 100 | 0.40±0.06  | 100 | 0.29±0.01              | 100 | 0.12±0.02  | 100 | 0.81±0.01                      | 100 |
| 125         | 0                     | 0.37±0.05* | 61  | 28.84±4.10*              | 61  | 0.46±0.09  | 137 | 0.52±0.14  | 129 | 0.42±0.02*             | 145 | 0.21±0.05* | 186 | 0.47±0.05*                     | 58  |
| 125         | 0.1                   | 0.30±0.10* | 51  | 23.73±8.34*              | 50  | 0.58±0.04* | 175 | 0.78±0.14* | 195 | 0.40±0.03*             | 137 | 0.30±0.07* | 263 | 0.51±0.02*                     | 63  |
| 125         | 1.0                   | 0.41±0.04* | 69  | 32.92±3.39*              | 69  | 0.55±0.07* | 165 | 0.81±0.16* | 200 | 0.33±0.03 <sup>#</sup> | 115 | 0.25±0.04* | 221 | 0.62±0.04* <sup>#</sup>        | 77  |
| 125         | 10.0                  | 0.51±0.02* | 86  | 40.32±1.67* <sup>#</sup> | 85  | 0.38±0.10  | 115 | 0.50±0.15  | 124 | 0.30±0.02 <sup>#</sup> | 103 | 0.20±0.01* | 177 | 0.75±0.02* <sup>#</sup>        | 92  |

\*p < 0.05 compared to the control value; <sup>#</sup>p < 0.05 compared to «125 mM NaCl» value.
