# Supplementary material for: Priming Potato Plants with Melatonin Protects Stolon Formation under Delayed Salt Stress by Maintaining the Photochemical Function of Photosystem II, Ionic Homeostasis and Activating the Antioxidant System
Source: MDPI journal article supplement (doi:10.3390/ijms24076134), 2023-03-24
Supplement: s1 [file s1]

**Table S4.** Influence of melatonin on the levels of *PAL* and *CHS1α* gene transcripts in *Solanum tuberosum* leaves under saline conditions.

| Treatment   |                    |                  |     |                    |     |
|-------------|--------------------|------------------|-----|--------------------|-----|
| NaCl,<br>mM | Melato-<br>nin, μM | <i>PAL</i>       | %   | <i>CHS1α</i>       | %   |
| 0           | 0                  | 0.320 ± 0.011    | 100 | 0.0113 ± 0.0006    | 100 |
| 125         | 0                  | 0.414 ± 0.009*   | 129 | 0.0039 ± 0.0003*   | 35  |
| 125         | 0.1                | 0.396 ± 0.004*   | 124 | 0.00419 ± 0.0002#  | 17  |
| 125         | 1.0                | 0.132 ± 0.004*,# | 41  | 0.0039 ± 0.0004*   | 34  |
| 125         | 10.0               | 0.232 ± 0.009*,# | 72  | 0.0047 ± 0.0004*,# | 42  |

\*p < 0.05 compared to the control value; #p < 0.05 compared to «125 mM NaCl» value.
